# Supplementary material for: Analysis of stochastic fluctuations in responsiveness is a critical step toward personalized anesthesia
Source: eLife. 2019 Dec 3;8:e50143. doi: 10.7554/eLife.50143 (PMC6890463; doi:10.7554/eLife.50143)
Supplement: Figure 2—source data 1. [file elife-50143-fig2-data1.xlsx]

## Sheet: Sheet1
Figure 2 Source Data
Figure 2B: Mouse average PRP at 0.6% isoflurane across trials averaged across 4 exposures							Figure 2D: Zebrafish PRP at 3µM propofol averaged across zebrafish
Trial #	PRP						Trial #	PRP
1	0.4625						1	0.541667
2	0.5						2	0.472222
3	0.475						3	0.458333
4	0.45						4	0.416667
5	0.4125						5	0.458333
6	0.4625						6	0.430556
7	0.45						7	0.5
8	0.4625						8	0.486111
9	0.4375						9	0.444444
10	0.375						10	0.486111
11	0.4625						11	0.472222
12	0.5375						12	0.444444
13	0.4125						13	0.5
14	0.375						14	0.541667
15	0.4						15	0.472222
16	0.35						16	0.486111
17	0.425						17	0.458333
18	0.375						18	0.5
19	0.25						19	0.513889
20	0.3375						20	0.5
21	0.4625						21	0.583333
22	0.3875						22	0.541667
23	0.475						23	0.555556
24	0.5125						24	0.555556
25	0.4						25	0.472222
26	0.3875						26	0.527778
27	0.475						27	0.486111
28	0.5						28	0.402778
29	0.45						29	0.541667
30	0.55						30	0.430556
31	0.4375						31	0.555556
32	0.475						32	0.555556
33	0.4625						33	0.444444
34	0.55						34	0.555556
35	0.5						35	0.513889
36	0.4375						36	0.527778
37	0.4875						37	0.5
38	0.475						38	0.5
39	0.475						39	0.375
40	0.45						40	0.472222
							41	0.388889
							42	0.486111
							43	0.416667
							44	0.569444
							45	0.5
							46	0.458333
							47	0.416667
							48	0.444444
							49	0.375
							50	0.472222
							51	0.541667
							52	0.486111
							53	0.486111
							54	0.569444
							55	0.486111
							56	0.5
							57	0.388889
							58	0.458333
							59	0.5
							60	0.5
							61	0.388889
							62	0.472222
							63	0.402778
							64	0.430556
							65	0.402778
							66	0.444444
							67	0.458333
							68	0.5
							69	0.444444
							70	0.472222
							71	0.5
							72	0.486111
							73	0.527778
							74	0.486111
							75	0.375
							76	0.388889
							77	0.527778
							78	0.416667
							79	0.486111
							80	0.486111
							81	0.5
							82	0.416667
							83	0.486111
							84	0.416667
							85	0.263889
							86	0.430556
							87	0.402778
							88	0.5
							89	0.486111
							90	0.541667
							91	0.388889
							92	0.541667
							93	0.527778
							94	0.527778
							95	0.388889
							96	0.472222
							97	0.5
							98	0.569444
							99	0.486111
							100	0.555556
							101	0.416667
							102	0.416667
							103	0.458333
							104	0.361111
							105	0.5
							106	0.416667
							107	0.402778
							108	0.5
							109	0.472222
							110	0.472222
							111	0.361111
							112	0.388889
							113	0.361111
							114	0.555556
							115	0.416667
							116	0.388889
							117	0.347222
							118	0.430556
							119	0.458333
							120	0.472222
							121	0.416667
							122	0.5
							123	0.458333
							124	0.444444
							125	0.430556
							126	0.430556
							127	0.430556
							128	0.361111
							129	0.513889
							130	0.472222
							131	0.430556
							132	0.5
							133	0.458333
							134	0.416667
							135	0.430556
							136	0.444444
							137	0.416667
							138	0.333333
							139	0.5
							140	0.388889
							141	0.402778
							142	0.472222
							143	0.444444
							144	0.388889
							145	0.430556
							146	0.388889
							147	0.416667
							148	0.333333
							149	0.402778
							150	0.472222
							151	0.416667
							152	0.402778
							153	0.486111
							154	0.388889
							155	0.375
							156	0.444444
							157	0.416667
							158	0.430556
							159	0.361111
							160	0.458333
							161	0.458333
							162	0.388889
							163	0.402778
							164	0.430556
							165	0.388889
							166	0.555556
							167	0.402778
							168	0.375
							169	0.416667
							170	0.444444
							171	0.458333
							172	0.486111
							173	0.527778
							174	0.5
							175	0.375
							176	0.458333
							177	0.444444
							178	0.444444
							179	0.541667
							180	0.486111
							181	0.513889
							182	0.375
							183	0.513889
							184	0.5
							185	0.444444
							186	0.5
							187	0.458333
							188	0.416667
							189	0.416667
							190	0.458333
							191	0.416667
							192	0.458333
							193	0.444444
							194	0.416667
							195	0.472222
							196	0.402778
							197	0.458333
							198	0.388889
							199	0.458333
							200	0.402778
							201	0.361111
							202	0.402778
							203	0.430556
							204	0.472222
							205	0.347222
							206	0.402778
							207	0.458333
							208	0.5
							209	0.444444
							210	0.416667
							211	0.458333
							212	0.430556
							213	0.416667
							214	0.444444
							215	0.402778
							216	0.333333
							217	0.388889
							218	0.375
							219	0.416667
							220	0.555556
							221	0.444444
							222	0.375
							223	0.444444
							224	0.513889
							225	0.513889
							226	0.472222
							227	0.361111
							228	0.430556
							229	0.347222
							230	0.5
							231	0.388889
							232	0.347222
							233	0.430556
							234	0.458333
							235	0.458333
							236	0.472222
							237	0.402778
							238	0.472222
							239	0.472222
							240	0.472222
							241	0.416667
							242	0.5
							243	0.486111
							244	0.430556
							245	0.430556
							246	0.486111
							247	0.416667
							248	0.5
							249	0.444444
							250	0.430556
							251	0.347222
							252	0.430556
							253	0.375
							254	0.416667
							255	0.430556
							256	0.472222
							257	0.472222
							258	0.402778
							259	0.402778
							260	0.486111
							261	0.458333
							262	0.486111
							263	0.513889
							264	0.458333
							265	0.402778
							266	0.402778
							267	0.333333
							268	0.375
							269	0.375
							270	0.430556
							271	0.527778
							272	0.430556
							273	0.402778
							274	0.527778
							275	0.486111
							276	0.486111
							277	0.444444
							278	0.430556
							279	0.472222
							280	0.5
							281	0.430556
							282	0.486111
							283	0.5
							284	0.458333
							285	0.513889
							286	0.527778
							287	0.541667
							288	0.388889
							289	0.388889
							290	0.472222
							291	0.361111
							292	0.416667
							293	0.388889
							294	0.444444
							295	0.430556
							296	0.513889
							297	0.430556
							298	0.458333
							299	0.458333
							300	0.527778
							301	0.444444
							302	0.555556
							303	0.430556
							304	0.513889
							305	0.5
							306	0.388889
							307	0.5
							308	0.430556
							309	0.347222
							310	0.375
							311	0.375
							312	0.444444
							313	0.430556
							314	0.458333
							315	0.388889
							316	0.444444
							317	0.444444
							318	0.375
							319	0.402778
							320	0.486111
							321	0.388889
							322	0.444444
							323	0.458333
							324	0.5
							325	0.416667
							326	0.458333
							327	0.444444
							328	0.416667
							329	0.472222
							330	0.541667
							331	0.486111
							332	0.444444
							333	0.458333
							334	0.388889
							335	0.416667
							336	0.361111
							337	0.5
							338	0.430556
							339	0.402778
							340	0.375
							341	0.513889
							342	0.430556
							343	0.472222
							344	0.430556
							345	0.291667
							346	0.444444
							347	0.5
							348	0.333333
							349	0.444444
							350	0.388889
							351	0.472222
							352	0.388889
							353	0.5
							354	0.444444
							355	0.486111
							356	0.486111
							357	0.430556
							358	0.472222
							359	0.416667
							360	0.361111
