# Supplementary material for: Analysis of stochastic fluctuations in responsiveness is a critical step toward personalized anesthesia
Source: eLife. 2019 Dec 3;8:e50143. doi: 10.7554/eLife.50143 (PMC6890463; doi:10.7554/eLife.50143)
Supplement: Figure 3—source data 1. [file elife-50143-fig3-data1.xlsx]

## Sheet: Sheet1
Figure 3 Source Data
Figure 3C: EC Values 0.6% isoflurane experimental vs simulated in mice						Figure 3D: EC Values 3µM Propofol experimental vs simulated in zebrafish						Figure 3E: Probability of State Transition Experimental vs Simulated in mice					Figure 3F: Probability of State Transition Experimental vs Simulated in Zebrafish					Figure 3G: Mouse P(U|R) vs P(U|U)				Figure 3H: Zebrafish P(U|R) vs P(U|U)
Mouse ID	Experimental EC	Simulated EC				Zebrafish ID	Experimental EC	Simulated EC				Mouse ID	Experimental P(Transition)	Simulated P(Transition)			Zebrafish ID	Experimental P(Transition)	Simulated P(Transition)			Mouse ID	P(U|R)	P(U|U)		Zebrafish ID	P(U|R)	P(U|U)
1	0.39375	0.425				1	0.644444	0.447222				1	0.34375	0.44375			1	0.427778	0.5			1	0.440797	0.559203		1	0.601563	0.398438
2	0.4375	0.6875				2	0.411111	0.461111				2	0.31875	0.4375			2	0.469444	0.480556			2	0.544505	0.455495		2	0.398104	0.601896
3	0.40625	0.375				3	0.447222	0.433333				3	0.36875	0.45625			3	0.366667	0.475			3	0.320192	0.679808		3	0.333333	0.666667
4	0.375	0.46875				4	0.575	0.441667				4	0.44375	0.375			4	0.391667	0.480556			4	0.468403	0.531597		4	0.464052	0.535948
5	0.38125	0.08125				5	0.5	0.461111				5	0.1375	0.40625			5	0.441667	0.483333			5	0.0796569	0.920343		5	0.441341	0.558659
6	0.40625	0.375				6	0.35	0.483333				6	0.41875	0.4625			6	0.361111	0.447222			6	0.334982	0.665018		6	0.277778	0.722222
7	0.45625	0.55				7	0.355556	0.441667				7	0.46875	0.48125			7	0.358333	0.463889			7	0.583053	0.416947		7	0.277056	0.722944
8	0.425	0.61875				8	0.452778	0.455556				8	0.3625	0.5			8	0.408333	0.5			8	0.582799	0.417201		8	0.375635	0.624365
9	0.4625	0.13125				9	0.638889	0.433333				9	0.24375	0.49375			9	0.386111	0.525			9	0.144173	0.855827		9	0.538462	0.461538
10	0.4375	0.49375				10	0.5	0.452778				10	0.39375	0.43125			10	0.402778	0.455556			10	0.457841	0.542159		10	0.402235	0.597765
11	0.44375	0.6875				11	0.513889	0.469444				11	0.28125	0.4125			11	0.394444	0.472222			11	0.576862	0.423138		11	0.408046	0.591954
12	0.525	0.7				12	0.416667	0.444444				12	0.26875	0.5125			12	0.433333	0.497222			12	0.483165	0.516835		12	0.373206	0.626794
13	0.48125	0.59375				13	0.536111	0.444444				13	0.4125	0.5375			13	0.469444	0.527778			13	0.594375	0.405625		13	0.508982	0.491018
14	0.475	0.61875				14	0.241667	0.427778				14	0.5	0.4			14	0.288889	0.508333			14	0.664334	0.335666		14	0.191176	0.808824
15	0.425	0.56875				15	0.472222	0.447222				15	0.31875	0.4625			15	0.497222	0.463889			15	0.603021	0.396979		15	0.470899	0.529101
16	0.5	0.3				16	0.5	0.447222				16	0.34375	0.41875			16	0.436111	0.488889			16	0.288749	0.711251		16	0.435754	0.564246
17	0.53125	0.25625				17	0.477778	0.458333				17	0.26875	0.45			17	0.45	0.475			17	0.226507	0.773493		17	0.430851	0.569149
18	0.45	0.1875				18	0.458333	0.433333				18	0.2125	0.5375			18	0.422222	0.472222			18	0.147034	0.852966		18	0.389744	0.610256
19	0.49375	0.4125				19	0.452778	0.452778				19	0.38125	0.4625			19	0.430556	0.497222			19	0.332906	0.667094		19	0.392857	0.607143
20	0.45	0.35				20	0.638889	0.425				20	0.34375	0.44375			20	0.441667	0.527778			20	0.28553	0.71447		20	0.612403	0.387597
						21	0.683333	0.505556									21	0.355556	0.508333							21	0.561404	0.438596
						22	0.544444	0.494444									22	0.452778	0.525							22	0.496933	0.503067
						23	0.344444	0.475									23	0.386111	0.508333							23	0.293617	0.706383
						24	0.297222	0.455556									24	0.383333	0.511111							24	0.27381	0.72619
						25	0.541667	0.433333									25	0.433333	0.436111							25	0.47561	0.52439
						26	0.402778	0.444444									26	0.397222	0.525							26	0.334884	0.665116
						27	0.511111	0.458333									27	0.502778	0.502778							27	0.514286	0.485714
						28	0.605556	0.463889									28	0.383333	0.466667							28	0.485915	0.514085
						29	0.586111	0.477778									29	0.405556	0.480556							29	0.493243	0.506757
						30	0.261111	0.419444									30	0.369444	0.494444							30	0.249057	0.750943
						31	0.352778	0.483333									31	0.383333	0.475							31	0.297414	0.702586
						32	0.352778	0.402778									32	0.422222	0.477778							32	0.32618	0.67382
						33	0.413889	0.455556									33	0.405556	0.508333							33	0.345972	0.654028
						34	0.472222	0.480556									34	0.430556	0.505556							34	0.407407	0.592593
						35	0.230556	0.469444									35	0.338889	0.5							35	0.221014	0.778986
						36	0.369444	0.45									36	0.377778	0.511111							36	0.300885	0.699115
						37	0.422222	0.425									37	0.394444	0.530556							37	0.341346	0.658654
						38	0.311111	0.486111									38	0.330556	0.458333							38	0.238866	0.761134
						39	0.288889	0.444444									39	0.325	0.491667							39	0.227451	0.772549
						40	0.358333	0.483333									40	0.405556	0.533333							40	0.317391	0.682609
						41	0.786111	0.438889									41	0.3	0.502778							41	0.701299	0.298701
						42	0.455556	0.45									42	0.402778	0.519444							42	0.369231	0.630769
						43	0.322222	0.430556									43	0.294444	0.505556							43	0.218107	0.781893
						44	0.411111	0.519444									44	0.416667	0.488889							44	0.353774	0.646226
						45	0.361111	0.452778									45	0.425	0.502778							45	0.331878	0.668122
						46	0.327778	0.441667									46	0.344444	0.5							46	0.257261	0.742739
						47	0.291667	0.45									47	0.366667	0.486111							47	0.259843	0.740157
						48	0.405556	0.427778									48	0.411111	0.502778							48	0.345794	0.654206
						49	0.433333	0.427778									49	0.508333	0.466667							49	0.45098	0.54902
						50	0.422222	0.402778									50	0.447222	0.436111							50	0.389423	0.610577
						51	0.625	0.422222									51	0.405556	0.463889							51	0.544776	0.455224
						52	0.355556	0.430556									52	0.441667	0.483333							52	0.341991	0.658009
						53	0.422222	0.402778									53	0.372222	0.508333							53	0.323671	0.676329
						54	0.408333	0.466667									54	0.402778	0.547222							54	0.339623	0.660377
						55	0.519444	0.483333									55	0.347222	0.483333							55	0.360465	0.639535
						56	0.836111	0.416667									56	0.236111	0.452778							56	0.724138	0.275862
						57	0.427778	0.5									57	0.527778	0.491667							57	0.463415	0.536585
						58	0.280556	0.45									58	0.338889	0.488889							58	0.236434	0.763566
						59	0.311111	0.483333									59	0.388889	0.461111							59	0.282258	0.717742
						60	0.447222	0.4									60	0.402778	0.513889							60	0.363636	0.636364
						61	0.422222	0.427778									61	0.447222	0.519444							61	0.389423	0.610577
						62	0.363889	0.427778									62	0.386111	0.491667							62	0.305677	0.694323
						63	0.455556	0.486111									63	0.463889	0.497222							63	0.428571	0.571429
						64	0.433333	0.486111									64	0.469444	0.569444							64	0.413793	0.586207
						65	0.341667	0.436111									65	0.4	0.516667							65	0.305085	0.694915
						66	0.433333	0.447222									66	0.466667	0.5							66	0.413793	0.586207
						67	0.611111	0.416667									67	0.372222	0.480556							67	0.478571	0.521429
						68	0.677778	0.391667									68	0.386111	0.477778							68	0.6	0.4
						69	0.538889	0.438889									69	0.480556	0.483333							69	0.524096	0.475904
						70	0.5	0.472222									70	0.372222	0.497222							70	0.374302	0.625698
						71	0.438889	0.469444									71	0.361111	0.511111							71	0.321782	0.678218
						72	0.316667	0.436111									72	0.388889	0.491667							72	0.285714	0.714286
