# Supplementary material for: Analysis of stochastic fluctuations in responsiveness is a critical step toward personalized anesthesia
Source: eLife. 2019 Dec 3;8:e50143. doi: 10.7554/eLife.50143 (PMC6890463; doi:10.7554/eLife.50143)
Supplement: Figure 4—source data 1. [file elife-50143-fig4-data1.xlsx]

## Sheet: Sheet1
Figure 4 Source Data
Figure 4C: P(U|U) vs P(R|R) in mice exposed to 0.6% isoflurane						Figure 4C: P(U|U) vs P(R|R) in zebrafish exposed to 3µM Propofol
Mouse ID	P(U|U)	P(R|R)				Figure 4C: P(U|U) vs P(R|R) in zebrafish exposed to 3µM Propofol	P(U|U)	P(R|R)
1	0.559203	0.491933				1	0.398438	0.666667
2	0.455495	0.752249				2	0.601896	0.425676
3	0.679808	0.470833				3	0.666667	0.590062
4	0.531597	0.485507				4	0.535948	0.660194
5	0.920343	0.133333				5	0.558659	0.555556
6	0.665018	0.417411				6	0.722222	0.48
7	0.416947	0.551557				7	0.722944	0.492188
8	0.417201	0.666				8	0.624365	0.549383
9	0.855827	0.05				9	0.461538	0.69869
10	0.542159	0.501132				10	0.597765	0.594444
11	0.423138	0.804156				11	0.591954	0.616216
12	0.516835	0.761905				12	0.626794	0.48
13	0.405625	0.63885				13	0.491018	0.5625
14	0.335666	0.583013				14	0.808824	0.402299
15	0.396979	0.550357				15	0.529101	0.470588
16	0.711251	0.354258				16	0.564246	0.561111
17	0.773493	0.386364				17	0.569149	0.526316
18	0.852966	0.254464				18	0.610256	0.536585
19	0.667094	0.495923				19	0.607143	0.521472
20	0.71447	0.473214				20	0.387597	0.652174
						21	0.438596	0.738776
						22	0.503067	0.581633
						23	0.706383	0.435484
						24	0.72619	0.35514
						25	0.52439	0.6
						26	0.665116	0.506944
						27	0.485714	0.505435
						28	0.514085	0.682028
						29	0.506757	0.654028
						30	0.750943	0.287234
						31	0.702586	0.456693
						32	0.67382	0.396825
						33	0.654028	0.506757
						34	0.592593	0.541176
						35	0.778986	0.26506
						36	0.699115	0.488722
						37	0.658654	0.529801
						38	0.761134	0.464286
						39	0.772549	0.432692
						40	0.682609	0.434109
						41	0.298701	0.808511
						42	0.630769	0.554878
						43	0.781893	0.543103
						44	0.646226	0.489796
						45	0.668122	0.407692
						46	0.742739	0.474576
						47	0.740157	0.371429
						48	0.654206	0.489655
						49	0.54902	0.412903
						50	0.610577	0.470199
						51	0.455224	0.675556
						52	0.658009	0.375
						53	0.676329	0.559211
						54	0.660377	0.503401
						55	0.639535	0.663102
						56	0.275862	0.857143
						57	0.536585	0.383117
						58	0.763566	0.39604
						59	0.717742	0.369369
						60	0.636364	0.546584
						61	0.610577	0.470199
						62	0.694323	0.469231
						63	0.571429	0.490798
						64	0.586207	0.455128
						65	0.694915	0.414634
						66	0.586207	0.461538
						67	0.521429	0.694064
						68	0.4	0.713115
						69	0.475904	0.554404
						70	0.625698	0.627778
						71	0.678218	0.585987
						72	0.714286	0.385965
