# Supplementary material for: Analysis of stochastic fluctuations in responsiveness is a critical step toward personalized anesthesia
Source: eLife. 2019 Dec 3;8:e50143. doi: 10.7554/eLife.50143 (PMC6890463; doi:10.7554/eLife.50143)
Supplement: Figure 5—source data 1. [file elife-50143-fig5-data1.xlsx]

## Sheet: Sheet1
Figure 5 Source Data
Figure 5A: PC1 Comparison Between First Two and Second Two Exposures in Mice Exposed to 0.6% Isoflurane									Figure 5A: PC1 Comparison Between First Half and Second Half Of an Exposure in Zebrafish Exposed to 3µM Propofol
Mouse ID	PC1 Expsoure 1,2	PC1 Exposure 3,4							Zebrafish ID	PC1 1st Half Experiment	PC1 2nd Half Experiment
1	-0.167955	0.203998							1	0.195717	0.234614
2	0.278076	0.285368							2	-0.0687627	-0.124192
3	-0.128913	-0.026453							3	-0.0027717	-0.0442905
4	-0.0695884	0.132584							4	-0.0363033	0.239194
5	-0.433707	-0.521017							5	0.170558	-0.0996703
6	-0.0889997	-0.126804							6	-0.0049771	-0.33756
7	0.26111	0.0527468							7	-0.021721	-0.273367
8	0.122779	0.362193							8	-0.0596898	0.0253604
9	-0.546173	-0.47288							9	0.134863	0.247734
10	0.260808	-0.1884							10	0.103015	-0.0400383
11	0.236697	0.447383							11	-0.0071404	0.10406
12	0.501381	0.0761129							12	-0.0511198	-0.0895635
13	0.303739	0.155897							13	-0.0211517	0.176609
14	0.224201	0.244478							14	-0.186471	-0.331223
15	-0.243514	0.58203							15	-0.0112761	-0.0178805
16	-0.201948	-0.169725							16	-0.0867758	0.123979
17	-0.19412	-0.211926							17	0.167892	-0.184944
18	-0.186381	-0.522567							18	0.0868908	-0.16246
19	0.0589992	-0.159932							19	0.0390146	-0.112993
20	0.0135077	-0.211235							20	0.340879	0.0857338
									21	0.289149	0.198687
									22	0.112079	0.0651948
									23	-0.0783147	-0.253159
									24	-0.350254	-0.141729
									25	0.124399	0.0505081
									26	-0.133305	-0.0304794
									27	0.0859503	0.0109358
									28	0.295852	0.0293356
									29	0.168764	0.104818
									30	-0.21244	-0.38728
									31	-0.0873851	-0.188672
									32	-0.17164	-0.14069
									33	-0.0938986	-0.0528188
									34	-0.148778	0.132603
									35	-0.283365	-0.381292
									36	0.0588892	-0.330094
									37	0.057986	-0.166929
									38	-0.0042102	-0.443924
									39	-0.253823	-0.169369
									40	-0.14736	-0.132903
									41	0.283577	0.596608
									42	0.0207258	-0.0687712
									43	-0.0839018	-0.182658
									44	-0.0009121	-0.170432
									45	-0.18509	-0.126145
									46	-0.0330803	-0.335135
									47	-0.303719	-0.183158
									48	-0.0740117	-0.097911
									49	-0.0421205	-0.0929997
									50	-0.0200305	-0.11478
									51	0.099342	0.295989
									52	-0.114629	-0.230376
									53	-0.0663769	-0.0300263
									54	0.0694913	-0.275978
									55	0.148013	-0.0641861
									56	0.443268	0.413379
									57	-0.0941251	-0.0703583
									58	-0.167228	-0.292912
									59	-0.286023	-0.158206
									60	0.128729	-0.184961
									61	-0.0109954	-0.12285
									62	-0.0322159	-0.224685
									63	-0.0356563	-0.0113643
									64	0.0214695	-0.155198
									65	-0.225272	-0.124503
									66	-0.0933995	-0.0271949
									67	0.309922	0.0111811
									68	0.414487	0.119818
									69	-0.0011121	0.183641
									70	0.202964	-0.136207
									71	-0.014139	-0.0553204
									72	-0.166914	-0.233422
