# Supplementary material for: Analysis of stochastic fluctuations in responsiveness is a critical step toward personalized anesthesia
Source: eLife. 2019 Dec 3;8:e50143. doi: 10.7554/eLife.50143 (PMC6890463; doi:10.7554/eLife.50143)
Supplement: Figure 6—source data 1. [file elife-50143-fig6-data1.xlsx]

## Sheet: Sheet1
Source Data Figure 6
Figure 6B: PC1 Values from P(U|U) and P(R|R) for Mice Exposed to 0.6% and 0.3% Isoflurane for Response Probability Density Functions
Mouse ID	Exposed to	PC1
1	0.6% Iso	-0.164144
2	0.6% Iso	0.094567
3	0.6% Iso	-0.263495
4	0.6% Iso	-0.149456
5	0.6% Iso	-0.673019
6	0.6% Iso	-0.291388
7	0.6% Iso	-0.022103
8	0.6% Iso	0.059606
9	0.6% Iso	-0.687575
10	0.6% Iso	-0.145656
11	0.6% Iso	0.154311
12	0.6% Iso	0.058623
13	0.6% Iso	0.048267
14	0.6% Iso	0.057187
15	0.6% Iso	-0.009012
16	0.6% Iso	-0.368873
17	0.6% Iso	-0.389383
18	0.6% Iso	-0.539278
19	0.6% Iso	-0.236661
20	0.6% Iso	-0.286006
21	0.3% Iso	-0.167759
22	0.3% Iso	0.025975
23	0.3% Iso	0.075655
24	0.3% Iso	0.384534
25	0.3% Iso	0.182521
26	0.3% Iso	-0.190441
27	0.3% Iso	-0.082296
28	0.3% Iso	0.179446
29	0.3% Iso	-0.160001
30	0.3% Iso	0.159582
31	0.3% Iso	0.585397
33	0.3% Iso	0.153138
35	0.3% Iso	0.440938
36	0.3% Iso	0.44755
37	0.3% Iso	0.056647
38	0.3% Iso	0.58772
39	0.3% Iso	0.58081
40	0.3% Iso	0.494072
