# Supplementary material for: Analysis of stochastic fluctuations in responsiveness is a critical step toward personalized anesthesia
Source: eLife. 2019 Dec 3;8:e50143. doi: 10.7554/eLife.50143 (PMC6890463; doi:10.7554/eLife.50143)
Supplement: Figure 7—source data 1. [file elife-50143-fig7-data1.xlsx]

## Sheet: Sheet1
Source Data Figure 7
Figure 7A: PC1 Values from P(U|U) and P(R|R) for Mice Exposed to 0.4% and 0.7% Isoflurane for Response Probability Density Functions
Mouse ID	PC1 0.4%	PC1 0.7%
41	0.2235	-0.2406
42	0.4662	0.2087
43	0.0494	-0.5536
44	0.0456	-0.3458
45	0.36	-0.0995
46	0.2251	-0.258
47	0.0882	-0.372
48	0.2316	-0.0658
49	0.1801	-0.2494
50	0.3117	-0.0063
51	0.008	-0.3915
52	0.2407	-0.2695
53	0.3785	-0.2718
54	0.2158	-0.1973
55	0.243	-0.398
56	0.1182	-0.1609
57	0.3087	-0.0537
58	0.2195	-0.2753
59	0.1781	-0.0933
60	0.2534	-0.252
