# Supplementary material for: Analysis of stochastic fluctuations in responsiveness is a critical step toward personalized anesthesia
Source: eLife. 2019 Dec 3;8:e50143. doi: 10.7554/eLife.50143 (PMC6890463; doi:10.7554/eLife.50143)
Supplement: Source code 3. [file elife-50143-code3.m]

function [nextState]=MarkovProcess(currentState,P)
% given current state of the system and transition probability matrix will
% output the next state of the system. If the current state of the system
% is not observed (sum across the row is zero) then will choose at random
% from a distribution of possible states.

% state 1-->n (dont start at zero)

C=cumsum(P(currentState,:));

    r=rand;
    nextState=find(r<=C,1);
    if isempty(nextState)
        possibleStates=find(sum(P,2));
        nextState=randsample(possibleStates,1);
    else
    end
end
